# Supplementary material for: Validation of the Italian Version of the SARC-F Questionnaire to Assess Sarcopenia in Older Adults
Source: MDPI journal article supplement (doi:10.3390/nu14122533), 2022-06-18
Supplement: s1 [file s1]

**SARC-F Screening per la Sarcopenia VERSIONE ITALIANA**

---

| VARIABILI                               | DOMANDA                                                                         | PUNTEGGIO                |
|-----------------------------------------|---------------------------------------------------------------------------------|--------------------------|
| FORZA                                   | Quanta difficoltà avverte nel sollevare e portare con sé un peso di circa 5 kg? | nessuno 0                |
|                                         |                                                                                 | qualche 1                |
|                                         |                                                                                 | molto (o non in grado) 2 |
| ASSISTENZA NELLA CAMMINATA              | Avverte difficoltà nel camminare all'interno di una stanza?                     | nessuno 0                |
|                                         |                                                                                 | qualche 1                |
|                                         |                                                                                 | molto (o non in grado) 2 |
| DIFFICOLTA' DI MOVIMENTO DA LETTO\SEDIA | Quanta difficoltà avverte nel trasferirsi da una sedia al letto?                | nessuno 0                |
|                                         |                                                                                 | qualche 1                |
|                                         |                                                                                 | molto (o non in grado) 2 |
| SALIRE LE SCALE                         | Quanta difficoltà avverte a salire una rampa di 10 scale?                       | nessuno 0                |
|                                         |                                                                                 | qualche 1                |
|                                         |                                                                                 | molto (o non in grado) 2 |
| CADUTE                                  | Quante volte è caduto a terra durante l'ultimo anno                             | nessuno 0                |
|                                         |                                                                                 | qualche 1                |
|                                         |                                                                                 | molto (o non in grado) 2 |

Punteggio totale \_\_\_\_\_
